# Supplementary material
Source: PubMed Central journal article supplement (PMC133617)
Supplement: mbc_13_11_4100__1.pdf [file mbc_13_11_4100__1.pdf]

**Supplemental Table.** Identities and functional classes of the 213 proteins identified within purified nucleoli of HeLa cells.

| Gel fragment in 1-DE | Id. in 2-DE | Protein name                         | DB entry   | Accession number | MW | pI    | Id. also by oth. | Dem. function | Hom. protein with dem. function | Funct. class |
|----------------------|-------------|--------------------------------------|------------|------------------|----|-------|------------------|---------------|---------------------------------|--------------|
| 93                   |             | 40 S Ribosomal protein S11           | RS11_HUMAN | P04643           | 18 | 10.31 | √                | Yes           |                                 | C1           |
| 100                  |             | 40 S Ribosomal protein S14           | RS14_HUMAN | P06366           | 16 | 10.07 |                  | Yes           |                                 | C1           |
| 104                  |             | 40 S Ribosomal protein S15a          | RS1A_HUMAN | P39027           | 15 | 10.14 |                  | Yes           |                                 | C1           |
| 61                   |             | 40 S Ribosomal protein S3a           | RS3A_HUMAN | P49241           | 30 | 9.75  | √                | Yes           |                                 | C1           |
| 67                   |             | 40 S Ribosomal protein S4, X isoform | RS4_HUMAN  | P12750           | 29 | 10.16 | √                | Yes           |                                 | C1           |
| 82                   |             | 40 S Ribosomal protein S5            | RS5_HUMAN  | P46782           | 23 | 9.59  | √                | Yes           |                                 | C1           |
| 62                   |             | 60 S acidic Ribosomal protein PO     | Q9UKD2     | Q9UKD2           | 28 | 7.68  | √                | Yes           |                                 | C1           |
| 72                   |             | 60 S Ribosomal protein L10a          | R10A_HUMAN | P53025           | 25 | 9.94  | √                | Yes           |                                 | C1           |
| 93, 94               |             | 60 S Ribosomal protein L11           | RL11_HUMAN | P39026           | 20 | 9.64  | √                | Yes           |                                 | C1           |
| 93, 94               |             | 60 S Ribosomal protein L12           | RL12_HUMAN | P30050           | 18 | 9.48  | √                | Yes           |                                 | C1           |
| 74                   |             | 60 S Ribosomal protein L14           | RL14_HUMAN | P50914           | 23 | 10.94 | √                | Yes           |                                 | C1           |
| 78, 79               |             | 60 S Ribosomal protein L15           | RL15_HUMAN | P39030           | 24 | 11.62 | √                | Yes           |                                 | C1           |
| 81                   |             | 60 S Ribosomal protein L18           | RL18_HUMAN | Q07020           | 22 | 11.73 | √                | Yes           |                                 | C1           |
| 88                   |             | 60 S Ribosomal protein L18a          | RL1X_HUMAN | Q02543           | 21 | 10.72 |                  | Yes           |                                 | C1           |
| 86, 87               |             | 60 S Ribosomal protein L21           | RL21_HUMAN | P46778           | 18 | 10.49 |                  | Yes           |                                 | C1           |
| 100, 101             |             | 60 S Ribosomal protein L22           | RL22_HUMAN | P35268           | 15 | 9.22  | √                | Yes           |                                 | C1           |
| 102, 103             |             | 60 S Ribosomal protein L23           | RL23_HUMAN | P23131           | 15 | 10.51 |                  | Yes           |                                 | C1           |
| 92, 93               |             | 60 S Ribosomal protein L23A          | RL2B_HUMAN | P29316           | 18 | 10.44 | √                | Yes           |                                 | C1           |
| 98                   |             | 60 S Ribosomal protein L27           | RL27_HUMAN | P08526           | 16 | 10.56 | √                | Yes           |                                 | C1           |
| 97                   |             | 60 S Ribosomal protein L27A          | RL2A_HUMAN | P46776           | 16 | 11,00 | √                | Yes           |                                 | C1           |

|          |                                                    |            |          |     |       |   |     |                                 |    |
|----------|----------------------------------------------------|------------|----------|-----|-------|---|-----|---------------------------------|----|
| 41, 42   | 60 S Ribosomal protein L3                          | RL3_HUMAN  | P39023   | 46  | 10.19 | √ | Yes |                                 | C1 |
| 103, 104 | 60 S Ribosomal protein L30                         | RL30_HUMAN | P04645   | 13  | 9.65  |   | Yes |                                 | C1 |
| 88       | 60 S Ribosomal protein L30 isolog                  | Q9UHA3     | Q9UHA3   | 20  | 9.99  |   | No  | yeast 60 S ribosomal protein L4 | C1 |
| 99, 100  | 60 S Ribosomal protein L31                         | RL31_HUMAN | P12947   | 14  | 10.54 | √ | Yes |                                 | C1 |
| 97       | 60 S Ribosomal protein L35                         | RL35_HUMAN | P42766   | 14  | 11.04 |   | Yes |                                 | C1 |
| 104, 105 | 60 S Ribosomal protein L35a                        | R35A_HUMAN | P18077   | 12  | 10.91 |   | Yes |                                 | C1 |
| 36       | 60 S Ribosomal protein L4                          | RL4_HUMAN  | P36578   | 48  | 11.12 | √ | Yes |                                 | C1 |
| 57       | 60 S Ribosomal protein L6                          | RL6_HUMAN  | Q02878   | 33  | 10.59 | √ | Yes |                                 | C1 |
| 66       | 60 S Ribosomal protein L7                          | RL7_HUMAN  | P18124   | 29  | 10.66 | √ | Yes |                                 | C1 |
| 64, 65   | 60 S Ribosomal protein L7a                         | RL7A_HUMAN | P11518   | 30  | 10.61 | √ | Yes |                                 | C1 |
| 83, 84   | 60 S Ribosomal protein L9                          | RL9_HUMAN  | P32969   | 22  | 9.96  | √ | Yes |                                 | C1 |
| 36       | Ribosomal protein                                  | G1432359   | G1432359 | 48  | 11.07 |   | No  | human 60 S ribosomal protein L4 | C1 |
| 36, 37   | similar to Ribosomal protein L4                    | Q9BSV5     | Q9BSV5   | 38  | 11.03 |   | No  | human 60 S ribosomal protein L4 | C1 |
| 12       | Autoantigen NGP1                                   | NGP1_HUMAN | Q13823   | 84  | 9.27  | √ | No  | yeast Nog2p                     | C2 |
| 12       | CDNA FLJ10377 fis, clone NT2RM2001989              | Q9NW13     | Q9NW13   | 86  | 9.29  | √ | No  | yeast Nop4p                     | C2 |
| 15       | CDNA FLJ12917 fis, clone NT2RP2004568              | Q9H990     | Q9H990   | 87  | 9.26  | √ | No  | yeast Drs1p                     | C2 |
| 20       | CDNA FLJ13633 fis, clone PLACE1011114              | Q9H8H2     | Q9H8H2   | 62  | 9.9   |   | No  | yeast Dbp7p                     | C2 |
| 36, 37   | CDNA FLJ13970 fis, clone Y79AA1001533              | Q9GZS1     | Q9GZS1   | 47  | 9.1   |   | No  | murine PAF53                    | C2 |
| 12       | DHM1-like protein (or Q9H0D6, Q9NXS6)              | Q9UL53     | Q9UL53   | 109 | 7.99  |   | No  | yeast Rat1p                     | C2 |
| 14       | DNA Topoisomerase I                                | TOP1_HUMAN | P11387   | 91  | 9.33  | √ | Yes |                                 | C2 |
| 12       | DNA-directed RNA polymerase I 135 Kda polypeptide  | RPA2_HUMAN | Q9H9Y6   | 122 | 8.11  |   | Yes |                                 | C2 |
|          | + DNA-directed RNA polymerase I 16 kDa polypeptide | RPA9_HUMAN | Q9Y2S0   | 15  | 5.55  |   | Yes |                                 | C2 |
| 47, 49   | + DNA-directed RNA polymerase I 40 kDa polypeptide | RPA5_HUMAN | O15160   | 39  | 5.31  | √ | Yes |                                 | C2 |
| 7, 9     | DNA-directed RNA polymerase I largest subunit      | RPA1_HUMAN | O95602   | 194 | 6.8   | √ | Yes |                                 | C2 |

|                               |                                                              |            |        |     |       |   |     |                                 |    |
|-------------------------------|--------------------------------------------------------------|------------|--------|-----|-------|---|-----|---------------------------------|----|
| 31                            | Dyskerin                                                     | DKC1_HUMAN | O60832 | 58  | 9.46  | √ | Yes |                                 | C2 |
|                               | + Exosome complex exonuclease RRP41                          | RR41_HUMAN | Q9NPD3 | 26  | 6.07  | √ | Yes |                                 | C2 |
| 12                            | Exosome complex exonuclease RRP44                            | RR44_HUMAN | Q9Y2L1 | 105 | 6.82  |   | Yes |                                 | C2 |
| 56, 57                        | Fibrillarin                                                  | FBRL_HUMAN | P22087 | 34  | 10.18 | √ | Yes |                                 | C2 |
| 33                            | + Glutamate-rich WD repeat protein                           | GRWD_HUMAN | Q9BQ67 | 49  | 4.82  | √ | No  | yeast Rrb1p                     | C2 |
| 90                            | HSPC180                                                      | Q9NZZ0     | Q99ZZ0 | 15  | 8.41  |   | No  | yeast Nip7p                     | C2 |
| 37, 38                        | Hypothetical 50.6 Kda protein (or Q9H4E3)                    | Q9H0S4     | Q9H0S4 | 51  | 9.18  | √ | No  | yeast Rrp3p                     | C2 |
| 30                            | Hypothetical 50.7 kDa protein (or O43159)                    | Q9BVM6     | Q9BVM6 | 51  | 9.51  | √ | No  | yeast Rrp8p                     | C2 |
| 57                            | Hypothetical protein FLJ21087 [fragment]                     | U170_HUMAN | Q9H7B2 | 29  | 9.88  |   | No  | yeast Rpf2p                     | C2 |
| 12                            | Hypothetical protein KIAA0052 [fragment]                     | Y052_HUMAN | P42285 | 118 | 6.19  | √ | No  | yeast Dob1p                     | C2 |
| 45, 46                        | Hypothetical protein KIAA0112 [fragment] (or Q9BUX8)         | Y112_HUMAN | Q15050 | 44  | 10.82 | √ | No  | yeast Rrs1p                     | C2 |
| 13                            | Hypothetical protein KIAA0124 [fragment] (or Q9BSA7, Q9BVM0) | Y124_HUMAN | Q14137 | 77  | 6.05  | √ | No  | mouse Bop1                      | C2 |
| 15                            | Hypothetical protein KIAA0179                                | Y179_HUMAN | Q14684 | 82  | 9.81  | √ | No  | human NNP-1                     | C2 |
| 12                            | Hypothetical protein KIAA0682                                | Y682_HUMAN | Q9Y4C8 | 107 | 6.17  | √ | No  | yeast Mrd1p                     | C2 |
| 86                            | NHP2 Protein                                                 | Q9NX24     | Q9NX24 | 17  | 8.48  | √ | Yes |                                 | C2 |
| 35, 36                        | NNP-1 protein                                                | NNP1_HUMAN | P56182 | 53  | 9.39  | √ | No  | yeast Rrp1p                     | C2 |
| 16                            | Nucleolar protein GU2                                        | Q9BQ39     | Q9BQ39 | 83  | 9.26  | √ | No  | human nucleolar RNA helicase II | C2 |
| 26, 27                        | Nucleolar protein NOP5/NOP58                                 | NOP5_HUMAN | Q9Y2X3 | 60  | 9.03  | √ | Yes |                                 | C2 |
| 23-25                         | Nucleolar protein Nop56                                      | NO56_HUMAN | O00567 | 67  | 9.28  | √ | Yes |                                 | C2 |
| 48, 49                        | Nucleolar protein P40                                        | Q99848     | Q99848 | 35  | 10.1  | √ | No  | yeast Ebp2p                     | C2 |
| 14-17, 23                     | Nucleolar RNA helicase II                                    | DD21_HUMAN | Q9NR30 | 80  | 9.42  | √ | Yes |                                 | C2 |
| 29                            | Nucleolar RNA-helicase                                       | Q9NY93     | Q9NY93 | 62  | 9.34  | √ | No  | yeast Dbp9p                     | C2 |
| 14-17, 23, 28, 33, 34         | Nucleolin                                                    | NUCL_HUMAN | P19338 | 76  | 4.59  | √ | Yes |                                 | C2 |
| 50-56, 58, 70, 84, 88, 93, 94 | + Nucleophosmin                                              | NPM_HUMAN  | P06748 | 33  | 4.64  | √ | Yes |                                 | C2 |
| 25                            | Pescadillo protein                                           | O00541     | O00541 | 68  | 6.93  | √ | No  | yeast Nop7p                     | C2 |

|            |                                                              |            |        |     |       |   |     |              |    |
|------------|--------------------------------------------------------------|------------|--------|-----|-------|---|-----|--------------|----|
| 14         | Polymyositis/Scleroderma autoantigen 2                       | PMC2_HUMAN | Q01780 | 101 | 8.68  | √ | Yes |              | C2 |
| 12         | Probable ATP-dependent RNA helicase DDX10                    | DD10_HUMAN | Q13206 | 101 | 8.72  | √ | No  | yeast Dbp4p  | C2 |
| 12-14, 16  | Proliferating-cell nucleolar antigen P120                    | NOL1_HUMAN | P46087 | 94  | 9.21  | √ | Yes |              | C2 |
| 27, 28     | Putative ATP-dependent RNA helicase ROK1 (or Q9Y482, Q9NVE0) | Q9Y2R4     | Q9Y2R4 | 67  | 9.6   | √ | No  | yeast Rok1p  | C2 |
| 58         | Putative dimethyladenosine transferase (or Q9UES1)           | Q9UNQ2     | Q9UNQ2 | 35  | 10.01 |   | No  | yeast Dim1p  | C2 |
| 40         | REV interacting protein RIP-1                                | Q13601     | Q13601 | 33  | 9.81  | √ | No  | yeast Krr1p  | C2 |
| 41, 42     | RNA binding protein                                          | Q9BXY0     | Q9BXY0 | 35  | 5.35  | √ | No  | yeast Mak16p | C2 |
| 42         | RNA processing factor 1 (or Q9H9Y2)                          | Q8WXZ8     | Q8WXZ8 | 40  | 10.01 | √ | No  | yeast Rpf1p  | C2 |
| 4, 5, 7, 9 | RRP5 protein homolog [fragment]                              | RRP5_HUMAN | Q14690 | 210 | 9.02  | √ | No  | yeast Rrp5p  | C2 |
| 47         | Similar to RIKEN cDNA 1110064N10 gene                        | Q96DH1     | Q96DH1 | 32  | 9.71  |   | No  | yeast Brix1p | C2 |
| 14         | Similar to RIKEN cDNA 2410015A15 gene                        | Q9BRZ1     | Q9BRZ1 | 82  | 9.94  | √ | No  | yeast Dbp10p | C2 |
| 29         | Suppressor of sterile four 1                                 | Q9NQ55     | Q9NQ55 | 53  | 10.13 | √ | No  | yeast Ssf1p  | C2 |
| 12, 13     | U3 small nucleolar ribonucleoprotein MPP10                   | MP10_HUMAN | O00566 | 79  | 4.77  | √ | Yes |              | C2 |
| 32, 33     | U3 snoRNP associated 55 kDa protein                          | O43818     | O43818 | 52  | 7.97  | √ | Yes |              | C2 |
|            | + Chromobox protein homolog 3                                | CBX3_HUMAN | Q13185 | 20  | 5.03  | √ | Yes |              | C3 |
| 50         | Core histone macro-H2A.1                                     | H2AY_HUMAN | O75367 | 39  | 9.8   |   | Yes |              | C3 |
| 100-102    | Histone H2/B f, d, l, n, r, q, s, a, j, e, h, c,             | H2BF_HUMAN | P33778 | 14  | 10.32 | √ | Yes |              | C3 |
| 102-104    | Histone H2A.e, g, o, m, a, l                                 | H2AE_HUMAN | Q99878 | 14  | 10.88 | √ | Yes |              | C3 |
| 100        | Histone H3/B, (or P16106, Q16695, P06351)                    | H3B_HUMAN  | Q93081 | 15  | 11.26 |   | Yes |              | C3 |
| 107, 108   | Histone H4                                                   | H4_HUMAN   | P02304 | 11  | 11.36 | √ | Yes |              | C3 |
| 31         | 54 Kda nuclear RNA- and DNA-binding protein                  | NR54_HUMAN | Q15233 | 54  | 9.01  | √ | Yes |              | C4 |
| 11         | ATP-dependant RNA helicase A                                 | DDX9_HUMAN | Q08211 | 141 | 6.35  |   | Yes |              | C4 |
| 10, 11     | CCAAT-box-binding transcription factor                       | CBF_HUMAN  | Q03701 | 114 | 5.19  | √ | Yes |              | C4 |

|         |                                                     |            |        |    |       |   |     |                                    |    |
|---------|-----------------------------------------------------|------------|--------|----|-------|---|-----|------------------------------------|----|
| 15      | Ded protein                                         | Q9NY61     | Q9NY61 | 63 | 4.83  | ✓ | No  | rat AATF                           | C4 |
|         | + DNA-directed RNA polymerase II 23 kDa polypeptide | RPB5_HUMAN | P19388 | 25 | 5.53  | ✓ | Yes |                                    | C4 |
| 18      | Double-stranded RNA specific adenosine deaminase    | Q9NS39     | Q9NS39 | 81 | 10.19 |   | No  | human ADAR family                  | C4 |
| 44      | Heterogeneous nuclear ribonucleoprotein D0          | ROD_HUMAN  | Q14103 | 38 | 7.61  |   | Yes |                                    | C4 |
| 58, 59  | Heterogeneous nuclear ribonucleoprotein A1          | ROA1_HUMAN | P09651 | 39 | 9.26  | ✓ | Yes |                                    | C4 |
| 28, 29  | + Heterogeneous nuclear ribonucleoprotein K         | ROK_HUMAN  | Q07244 | 51 | 5.39  | ✓ | Yes |                                    | C4 |
| 57      | Heterogeneous nuclear ribonucleoproteins A2/B1      | ROA2_HUMAN | P22626 | 37 | 8.97  | ✓ | Yes |                                    | C4 |
| 11      | Leukophysin                                         | Q12803     | Q12803 | 24 | 10.13 | ✓ | No  | human ATP-dependent RNA helicase A | C4 |
| 105-107 | NPH2-like protein 1                                 | NHPX_HUMAN | P55769 | 14 | 8.72  | ✓ | Yes |                                    | C4 |
| 33, 34  | + Nuclear matrix protein NMP200                     | Q9UMS4     | Q9UMS4 | 55 | 6.14  | ✓ | No  | yeast Cwf8p                        | C4 |
| 20      | Poly(A)-specific ribonuclease                       | O95453     | O95453 | 73 | 5.86  | ✓ | Yes |                                    | C4 |
| 33      | Polypyrimidine tract binding protein                | PTB_HUMAN  | P26599 | 57 | 9.22  |   | Yes |                                    | C4 |
| 27      | Probable RNA-dependent helicase P68                 | DDX5_HUMAN | P17844 | 69 | 9.06  | ✓ | Yes |                                    | C4 |
| 16, 17  | Putative pre-mRNA splicing factor RNA helicase      | DD15_HUMAN | O43143 | 91 | 7.12  | ✓ | No  | yeast Prp43p                       | C4 |
|         | + Putative spliceosome associated protein           | O75934     | O75934 | 26 | 5.48  |   | ?   |                                    | C4 |
| 89      | Splicing factor, arginine/serine-rich 3 (or Q16629) | SFR3_HUMAN | P23152 | 19 | 11.64 | ✓ | Yes |                                    | C4 |
| 13      | Splicing factor, prolin and glutamin rich           | SFPQ_HUMAN | P23246 | 76 | 9.45  | ✓ | Yes |                                    | C4 |
| 48      | Unknown                                             | Q9BQ99     | Q9BQ99 | 31 | 7.69  |   | No  | murine CArG binding factor A       | C4 |
| 20      | DEAD-box protein 3                                  | DDX3_HUMAN | O00571 | 73 | 6.73  | ✓ | No  | yeast Ded1p                        | C5 |
| 41, 42  | Elongation factor 1-alpha 1 (or Q05639, Q9NZS6)     | EF11_HUMAN | P04720 | 50 | 9.1   |   | Yes |                                    | C5 |
| 73      | + Eukariotic translation initiation factor 6        | IF6_HUMAN  | P56537 | 27 | 4.56  | ✓ | Yes |                                    | C5 |
| 95, 96  | Signal recognition particle 14 kDa protein          | SR14_HUMAN | P37108 | 15 | 10.05 | ✓ | Yes |                                    | C5 |
|         | + 60 kDa heat shock protein, mitochondrial          | CH60_HUMAN | P10809 | 61 | 5.7   | ✓ | Yes |                                    | C6 |

|         |   |                                                   |            |        |     |      |   |     |    |
|---------|---|---------------------------------------------------|------------|--------|-----|------|---|-----|----|
|         | + | Heat shock 70 kDa protein 1                       | HS71_HUMAN | P08107 | 70  | 5.48 | √ | Yes | C6 |
|         | + | Heat shock cognate 71 kDa protein                 | HS7C_Human | P11142 | 71  | 5.37 | √ | Yes | C6 |
| 94      |   | Peptidyl-prolyl cis-trans isomerase b [precursor] | CYPB_HUMAN | P23284 | 23  | 9.33 | √ | Yes | C6 |
|         | + | Protein disulfide isomerase A3                    | PDA3_HUMAN | P30101 | 57  | 5.98 | √ | Yes | C6 |
|         | + | Stress-70 protein, mitochondrial                  | GR75_HUMAN | P38646 | 74  | 5.97 | √ | Yes | C6 |
|         | + | T-complex protein 1, beta subunit                 | TCPB_HUMAN | P78371 | 57  | 6.01 |   | Yes | C6 |
|         | + | T-complex protein 1, epsilon subunit              | TCPE_HUMAN | P48643 | 60  | 5.45 |   | Yes | C6 |
| 23      | + | Actin, cytoplasmic 1                              | ACTB_HUMAN | P02570 | 42  | 5.29 | √ | Yes | C7 |
| 44, 45  |   | Actin, cytoplasmic 2                              | ACTG_HUMAN | P02571 | 42  | 5.31 |   | Yes | C7 |
|         | + | Keratin, type I cytoskeletal 10                   | K1CJ_HUMAN | P13645 | 60  | 5.13 |   | Yes | C7 |
|         | + | Keratin, type I cytoskeletal 17 [Version 1]       | K1CQ_HUMAN | Q04695 | 48  | 4.97 |   | Yes | C7 |
|         | + | Keratin, type I cytoskeletal 18                   | K1CR_HUMAN | P05783 | 48  | 5.34 |   | Yes | C7 |
|         | + | Keratin, type II cytoskeletal 1                   | K2C1_HUMAN | P04264 | 66  | 8.16 |   | Yes | C7 |
| 33      | + | Keratin, type II cytoskeletal 7                   | K2C7_HUMAN | P08729 | 51  | 5.41 |   | Yes | C7 |
| 35      | + | Keratin, type II cytoskeletal 8                   | K2C8_HUMAN | P05787 | 54  | 5.52 | √ | Yes | C7 |
|         | + | Lamin A/C                                         | LAMA_HUMAN | P02545 | 74  | 6.57 | √ | Yes | C7 |
| 33, 34  |   | Tubulin alpha-1 chain, brain-specific             | TBA1_HUMAN | P04687 | 50  | 5.02 | √ | Yes | C7 |
| 32, 33  | + | Vimentin                                          | VIME_HUMAN | P08670 | 54  | 5.06 |   | Yes | C7 |
| 18      |   | ATP-dependant DNA helicase II, 80 kDa subunit     | KU86_HUMAN | P13010 | 83  | 5.55 |   | Yes | C8 |
| 25      |   | ATP-dependent DNA helicase II, 70 kDa subunit     | KU70_HUMAN | P12956 | 70  | 6.23 | √ | Yes | C8 |
| 1, 3, 4 |   | DNA dependent protein kinase catalytic subunit    | PRKD_HUMAN | P78527 | 469 | 6.78 | √ | Yes | C8 |
| 45      |   | NF45 protein                                      | Q12905     | Q12905 | 45  | 8.26 | √ | Yes | C8 |
| 16, 17  |   | NF90 protein                                      | Q12906     | Q12906 | 73  | 6.05 |   | Yes | C8 |

|           |                                                           |            |        |     |      |   |     |               |     |
|-----------|-----------------------------------------------------------|------------|--------|-----|------|---|-----|---------------|-----|
| 48, 49    | Actin-like protein 2                                      | ARP2_HUMAN | O15142 | 45  | 6.29 | √ | Yes |               | C9  |
| 34        | Bystin                                                    | BYST_HUMAN | Q13895 | 35  | 9.71 | √ | Yes |               | C9  |
| 23        | + Calgizzarin (or Q9UDP3 or O60417)                       | S111_HUMAN | P31949 | 12  | 6.56 |   | Yes |               | C9  |
| 23        | Calgranulin A                                             | S108_HUMAN | P05109 | 11  | 6.51 |   | Yes |               | C9  |
| 23        | Calgranulin B                                             | S109_HUMAN | P06702 | 13  | 5.71 |   | Yes |               | C9  |
| 54        | Casein kinase II, alpha' chain                            | KC22_HUMAN | P19784 | 41  | 8.65 |   | Yes |               | C9  |
| 11        | CDNA FLJ10809 fis, clone NT2RP4000927 (or Q9H9C5, Q9P275) | Q9NVC8     | Q9NVC8 | 103 | 9.7  |   | No  | murine DUB-2A | C9  |
| 23        | Fatty acid-binding protein, epidermal                     | FABE_HUMAN | Q01469 | 15  | 6.6  |   | Yes |               | C9  |
| 33, 34    | Importin alpha-2 subunit                                  | IMA2_HUMAN | P52292 | 58  | 5.25 | √ | Yes |               | C9  |
|           | + Peroxiredoxin 2                                         | PDX2_HUMAN | P32119 | 22  | 5.66 |   | Yes |               | C9  |
|           | + Placental calcium-binding protein                       | S104_HUMAN | P26447 | 12  | 5.85 |   | Yes |               | C9  |
| 13        | Poly [ADP-ribose] polymerase-1                            | PPOL_HUMAN | P09874 | 113 | 8.99 | √ | Yes |               | C9  |
| 23        | Squamous cell carcinoma antigen 1                         | SCC1_HUMAN | P29508 | 45  | 6.35 |   | Yes |               | C9  |
| 84        | Ubiquitin                                                 | UBIQ_HUMAN | P02248 | 9   | 6.56 | √ | Yes |               | C9  |
| 18-20     | ATP-dependent RNA helicase DDX18 (or Q9BQB7)              | DD18_HUMAN | Q9NVP1 | 75  | 9.52 | √ | No  |               | C10 |
| 12        | ATP-dependent RNA helicase DDX24                          | DD24_HUMAN | Q9GZR7 | 96  | 9.14 |   | No  |               | C10 |
| 45        | CDNA : FLJ21730 fis, clone COLF1557                       | Q9H6X8     | Q9H6X8 | 28  | 8.96 | √ | No  |               | C10 |
| 38        | CDNA FLJ10458 fis, clone NT2RP1001457                     | Q9NVX2     | Q9NVX2 | 53  | 6.92 |   | No  |               | C10 |
| 48        | CDNA FLJ12671 fis, clone NT2RM4002323                     | Q9H9L3     | Q9H9L3 | 39  | 9.94 |   | No  |               | C10 |
| 32        | CDNA FLJ12787 fis, clone NT2RP2001943                     | Q9H9F8     | Q9H9F8 | 32  | 9.7  |   | No  |               | C10 |
| 13        | CDNA FLJ12820 fis, clone NT2RP2002736                     | Q9H9D8     | Q9H9D8 | 49  | 9.06 |   | No  |               | C10 |
| 18, 19    | CDNA FLJ13640 fis, clone PLACE1011221                     | Q9H8H0     | Q9H8H0 | 81  | 5.74 | √ | No  |               | C10 |
| 9, 10, 33 | CDNA FLJ20062 fis, clone COL01508 (or Q9BWM4)             | Q9NXT6     | Q9NXT6 | 66  | 5.69 |   | No  |               | C10 |

|          |                                                                |            |        |     |       |   |    |     |
|----------|----------------------------------------------------------------|------------|--------|-----|-------|---|----|-----|
| 15       | CDNA FLJ20287 fis, clone HEP04390                              | Q9NXF1     | Q9NXF1 | 106 | 9.45  |   | No | C10 |
| 43, 44   | CDNA FLJ20624 fis, clone KAT04557                              | Q9NWT1     | Q9NWT1 | 44  | 9.22  |   | No | C10 |
| 17       | CDNA FLJ23323 fis, clone HEP12456                              | Q9H5L4     | Q9H5L4 | 38  | 8.91  | √ | No | C10 |
| 15       | DJ475B7.2 (or Q9H9V5)                                          | Q9Y4W2     | Q9Y4W2 | 81  | 4.62  |   | No | C10 |
| 4        | DRIM Protein                                                   | O75691     | O75691 | 318 | 7.07  | √ | No | C10 |
|          | + ERYTHROCYTE CYTOSOLIC PROTEIN OF 54 kDa, ECP-54              | Q9Y265     | Q9Y265 | 50  | 6.02  |   | No | C10 |
| 56       | EST : gi14067717 (or 12314418, 4437541)                        |            |        |     |       |   | No | C10 |
| 9        | EST gi14378542 (or 15017735)                                   |            |        |     |       |   | No | C10 |
| 26       | Glioma tumor suppressor candidate region gene 2 protein        | GSR2_HUMAN | Q9NZM5 | 54  | 10.36 | √ | No | C10 |
| 27, 28   | Hepatocellular carcinoma-associated antigen 66                 | HC66_HUMAN | Q9NYH9 | 70  | 7.19  |   | No | C10 |
| 58, 59   | Heterogeneous nuclear ribonucleoprotein A0                     | ROA0_HUMAN | Q13151 | 31  | 9.34  |   | No | C10 |
| 45       | Heterogeneous nuclear ribonucleoprotein G                      | ROG_HUMAN  | P38159 | 42  | 10.02 | √ | No | C10 |
| 12       | Hypothetical 115.7 kDa protein (or Q9C0F4, Q9NVF2, Q9HA61)     | Q9H0A0     | Q9H0A0 | 116 | 8.5   |   | No | C10 |
| 9        | Hypothetical 140.5 kDa protein [fragment]                      | Q9BQG0     | Q9BQG0 | 141 | 9.36  |   | No | C10 |
| 60, 61   | Hypothetical 30.1 KDa protein                                  | O95478     | O95478 | 30  | 10.28 | √ | No | C10 |
| 42, 43   | Hypothetical 43.6 Kda protein                                  | Q9NX58     | Q9NX58 | 44  | 9.59  | √ | No | C10 |
| 45       | Hypothetical 43.8 Kda Protein [fragment]                       | Q9UG11     | Q9UG11 | 44  | 8.58  | √ | No | C10 |
|          | + Hypothetical 49.3 kDa protein                                | Q9H0U9     | Q9H0U9 | 49  | 5.36  |   | No | C10 |
| 29       | Hypothetical 58.5 kDa protein                                  | Q9BVI4     | Q9BVI4 | 58  | 7.08  |   | No | C10 |
| 23       | Hypothetical 59.6 kDa protein (fragment)                       | Q9BWK6     | Q9BWK6 | 60  | 9.2   |   | No | C10 |
| 1, 2, 14 | Hypothetical 80.4 Kda protein (or Q9H9V8, Q9H9U5)              | Q9UIX2     | Q9UIX2 | 80  | 5.59  |   | No | C10 |
| 14       | Hypothetical 84.9 kDa protein DKFZp564C186 (or Q9BTN6, Q9H9J5) | YU20_HUMAN | Q9Y3T9 | 85  | 5.34  | √ | No | C10 |
| 84       | Hypothetical protein CGI-117                                   | CGB7_HUMAN | Q9Y3C1 | 21  | 9.94  | √ | No | C10 |
| 25       | Hypothetical protein KIAA0020                                  | Y020_HUMAN | Q15397 | 58  | 8.96  | √ | No | C10 |
| 6, 7, 8  | Hypothetical protein KIAA0539 [fragment]                       | Y539_HUMAN | O60287 | 252 | 5.97  | √ | No | C10 |



|          |   |                                                                  |            |        |     |       |   |    |     |
|----------|---|------------------------------------------------------------------|------------|--------|-----|-------|---|----|-----|
| 36, 37   |   | Hypothetical RNA-binding protein KIAA0117 [fragment] (or Q9H5A1) | Y117_HUMAN | P42696 | 26  | 9.75  |   | No | C10 |
| 26       |   | Hypothetical WD-repeat protein CGI-48                            | CG48_Human | Q9Y5J1 | 43  | 8.97  | √ | No | C10 |
| 14       |   | ITBA4 protein [fragment]                                         | IBA4_HUMAN | O15226 | 27  | 9.45  |   | No | C10 |
| 20, 21   |   | KIAA0007 Protein [fragment] (or Q92577)                          | Q15061     | Q15061 | 76  | 5.46  | √ | No | C10 |
| 56       |   | KIAA0116 Protein [fragment]                                      | Q15024     | Q15024 | 32  | 5.08  | √ | No | C10 |
| 9        |   | KIAA0690 protein [fragment]                                      | Q9Y4C7     | Q9Y4C7 | 135 | 9.00  | √ | No | C10 |
| 33       |   | KIAA1470 Protein [fragment]                                      | Q9P258     | Q9P258 | 60  | 8.97  |   | No | C10 |
| 15       |   | Nuclear vcp-like protein NVLP.2                                  | O15381     | O15381 | 95  | 6.11  |   | No | C10 |
| 22       |   | Nucleolar GTP-binding protein 1                                  | NOG1_Human | Q9BZE4 | 74  | 9.52  | √ | No | C10 |
| 54       |   | Nucleolar phosphoprotein Nopp34                                  | Q9BYG3     | Q9BYG3 | 34  | 9.88  |   | No | C10 |
| 12       |   | Nucleolar RNA-associated protein alpha                           | Q8TEZ1     | Q8TEZ1 | 128 | 7.42  |   | No | C10 |
| 58       |   | OPA-interacting protein OIP2 [fragment]                          | O43480     | O43480 | 29  | 4.98  | √ | No | C10 |
| 25-28    |   | PBK1 protein                                                     | O76021     | O76021 | 58  | 10.12 | √ | No | C10 |
| 1, 12-14 |   | Periodic tryptophan protein 2 homolog                            | PWP2_HUMAN | Q15269 | 102 | 5.81  | √ | No | C10 |
| 43       | + | Proliferation-associated protein 2G4                             | P2G4_HUMAN | Q9UQ80 | 44  | 6.13  | √ | No | C10 |
| 7        |   | Protein BAP28                                                    | BP28_HUNAN | Q9H583 | 242 | 6.13  | √ | No | C10 |
| 26, 27   |   | Putative nucleotide binding protein, estradiol-induced           | Q9BVP2     | Q9BVP2 | 62  | 9.2   | √ | No | C10 |
|          | + | Putative S100 calcium-binding protein MGC17528                   | S11Z_Human | Q96FQ6 | 14  | 6.28  |   | No | C10 |
| 45       |   | Retinoic acid repressible protein                                | Q9UMY1     | Q9UMY1 | 29  | 9.68  | √ | No | C10 |
| 20       |   | Similar to hypothetical protein FLJ14075 (or Q9H7Y7)             | Q9BSC4     | Q9BSC4 | 80  | 8.64  | √ | No | C10 |
| 12       |   | Similar to KIAA0266 gene product                                 | Q9BVJ6     | Q9BVJ6 | 88  | 7.67  |   | No | C10 |
|          | + | Unknown                                                          | Q9BQ04     | Q9BQ04 | 40  | 6.28  |   | No | C10 |
| 36-38    |   | WD-repeat protein 12                                             | WDRC_Human | Q9GZL7 | 48  | 5.57  | √ | No | C10 |
| 14       |   | WD-repeat protein 3 (or Q9H141)                                  | WDR3_HUMAN | Q9UNX4 | 106 | 6.2   | √ | No | C10 |
| 16, 17   |   | WD-repeat protein SAZD                                           | TBL3_HUMAN | Q12788 | 56  | 8.39  | √ | No | C10 |

|    |                             |        |        |    |      |   |    |     |
|----|-----------------------------|--------|--------|----|------|---|----|-----|
| 39 | WUGSC:H_DJ0978E18.1 protein | O95020 | O95020 | 37 | 6.53 |   | No | C10 |
| 33 | XPMC2H                      | Q9GZR2 | Q9GZR2 | 47 | 9.79 | √ | No | C10 |

---

Proteins were extracted from purified nucleoli, separated either by 1-DE or by 2-DE, identified after mass spectrometry analyses and finally ordered according to the deduced functional classes in which they belong. Several data are given in the table for each identified protein. Gel fragment in 1-DE : number of the 1-D gel fragment containing the corresponding protein ; position of this gel fragment is indicated in Figure 3. Id. in 2-DE (Identification in 2-DE) : + indicates that the corresponding protein has been identified after separation by 2-DE (see Figure 4). Protein name, DB (database) entry and accession number : name, database entry and accession number of the corresponding protein found in SWISS-PROT, TrEMBL or GenBank databases. MW (molecular weight) and pI (isoelectric point) correspond to theoretical molecular weight and isoelectric point of the protein calculated using the Compute pI/Mw software ([www.expasy.org](http://www.expasy.org)). Id. (identified) also by oth. (others) : √ indicates that the corresponding protein was also found in the study of Andersen and colleagues (Andersen et al., 2002, Curr Biol, 12, 1-11). Dem. function (demonstrated function) : Yes or No indicate whether the protein has been shown or not to be involved in a biological process ; these data were obtained from an extensive bibliographic analysis, the corresponding references are not given in the table due to their very high number. Hom. (homologous) protein with dem. (demonstrated) function : the name of an homologous protein previously shown to be involved in a biological process is given. Funct. (functional) class : name of the deduced functional class for the corresponding protein ; C1, ribosomal proteins ; C2, ribosome biogenesis ; C3, chromatin structure ; C4, mRNA metabolism ; C5, translation factors ; C6, chaperones ; C7, fibrous proteins ; C8, DNA-PK complex ; C9, others ; C10, unpredictable function.

---
